# Supplementary material for: Characterisation of Australian MRSA Strains ST75- and ST883-MRSA-IV and Analysis of Their Accessory Gene Regulator Locus
Source: PLOS journal article supplement (doi:10.1371/journal.pone.0014025), 2010-11-17
Supplement: S3 (10.1371/journal.pone.0014025.s003) [file journal.pone.0014025.s003]

### Supplemental File S3: Detection of enterotoxin B

Array layout [36], as diagramm (left) and with the image of isolate 05-15398 superimposed (right)

|    |    |    |    |    |    |    |    |    |    |    |    |
|----|----|----|----|----|----|----|----|----|----|----|----|
| 1  | 39 | 40 | 41 | 42 | 43 | 44 | 45 | 46 | 47 | 47 | 1  |
|    | 28 | 29 | 30 | 31 | 32 | 33 | 34 | 35 | 36 | 37 | 38 |
| 1  | 17 | 18 | 19 | 20 | 21 | 22 | 23 | 24 | 25 | 26 | 27 |
| 1  | 6  | 7  | 8  | 9  | 10 | 11 | 12 | 13 | 14 | 15 | 16 |
| 39 | 40 | 41 | 42 | 43 | 44 | 45 | 46 | 2  | 3  | 4  | 5  |
| 27 | 28 | 29 | 30 | 31 | 32 | 33 | 34 | 35 | 36 | 37 | 38 |
| 15 | 16 | 17 | 18 | 19 | 20 | 21 | 22 | 23 | 24 | 25 | 26 |
| 3  | 4  | 5  | 6  | 7  | 8  | 9  | 10 | 11 | 12 | 13 | 14 |
| 36 | 37 | 38 | 39 | 40 | 41 | 42 | 43 | 44 | 45 | 46 | 2  |
| 24 | 25 | 26 | 27 | 28 | 29 | 30 | 31 | 32 | 33 | 34 | 35 |
| 12 | 13 | 14 | 15 | 16 | 17 | 18 | 19 | 20 | 21 | 22 | 23 |
| 1  | 2  | 3  | 4  | 5  | 6  | 7  | 8  | 9  | 10 | 11 | 1  |

|    |    |    |    |    |    |    |    |    |    |    |    |
|----|----|----|----|----|----|----|----|----|----|----|----|
| 1  | 39 | 40 | 41 | 42 | 43 | 44 | 45 | 46 | 47 | 47 | 1  |
|    | 28 | 29 | 30 | 31 | 32 | 33 | 34 | 35 | 36 | 37 | 38 |
| 1  | 17 | 18 | 19 | 20 | 21 | 22 | 23 | 24 | 25 | 26 | 27 |
| 1  | 6  | 7  | 8  | 9  | 10 | 11 | 12 | 13 | 14 | 15 | 16 |
| 39 | 40 | 41 | 42 | 43 | 44 | 45 | 46 | 2  | 3  | 4  | 5  |
| 27 | 28 | 29 | 30 | 31 | 32 | 33 | 34 | 35 | 36 | 37 | 38 |
| 15 | 16 | 17 | 18 | 19 | 20 | 21 | 22 | 23 | 24 | 25 | 26 |
| 3  | 4  | 5  | 6  | 7  | 8  | 9  | 10 | 11 | 12 | 13 | 14 |
| 36 | 37 | 38 | 39 | 40 | 41 | 42 | 43 | 44 | 45 | 46 | 2  |
| 24 | 25 | 26 | 27 | 28 | 29 | 30 | 31 | 32 | 33 | 34 | 35 |
| 12 | 13 | 14 | 15 | 16 | 17 | 18 | 19 | 20 | 21 | 22 | 23 |
| 1  | 2  | 3  | 4  | 5  | 6  | 7  | 8  | 9  | 10 | 11 | 1  |

- 1 biotin marker (staining controls; their asymmetrical distribution allows the correct alignment of the array to the grid)
- 2 - 4 ricin specific antibodies
- 5 - 36 botulinum toxin specific antibodies
- 37 *Staphylococcus aureus* enterotoxin A specific antibody
- 38 *Staphylococcus aureus* enterotoxin B specific antibody
- 39 *Staphylococcus aureus* enterotoxin B specific antibody
- 40 *Staphylococcus aureus* enterotoxin B specific antibody
- 41 *Staphylococcus aureus* enterotoxin B specific antibody
- 42 *Staphylococcus aureus* enterotoxin B specific antibody
- 43 *Staphylococcus aureus* enterotoxin B specific antibody
- 44 *Staphylococcus aureus* enterotoxin B specific antibody
- 45 *Staphylococcus aureus* enterotoxin C specific antibody
- 46 *Staphylococcus aureus* enterotoxin A/B/C/D/E cross-reactive antibody
- 47 negative control (buffer)

| Sample / strain                                                                           | Genotypic detection of <i>seb</i> by |                      | Phenotypic detection of enterotoxin B by protein array |
|-------------------------------------------------------------------------------------------|--------------------------------------|----------------------|--------------------------------------------------------|
|                                                                                           | Primer-directed amplification        | Random amplification |                                                        |
| <b>Recombinant SEB, 0.01 µg/ml</b><br>(as positive control)                               | n.a.                                 | n.a.                 | POSITIVE                                               |
| <b>ST250-MRSA-I, „Early/Ancstral MRSA“ reference strain COL</b><br>(as positive control)  | POSITIVE                             | POSITIVE             | POSITIVE                                               |
| <b>CC8-MRSA-IV, „Lyon Clone/UK-EMRSA-2“ isolate 2006VA041111</b><br>(as negative control) | NEGATIVE                             | n.a.                 | NEGATIVE                                               |
| <b>ST75-MRSA-IV, isolate 03-17848</b>                                                     | NEGATIVE                             | AMBIGUOUS            | NEGATIVE                                               |
| <b>ST75-MRSA-IV, isolate 04-16785</b>                                                     | NEGATIVE                             | AMBIGUOUS            | NEGATIVE                                               |
| <b>ST75-MRSA-IV, isolate 04-17542</b>                                                     | POSITIVE                             | POSITIVE             | POSITIVE                                               |
| <b>ST75-MRSA-IV, isolate 05-15398</b>                                                     | POSITIVE                             | POSITIVE             | POSITIVE                                               |
| <b>ST883-MRSA-IV, isolate 06-16607</b>                                                    | NEGATIVE                             | NEGATIVE             | NEGATIVE                                               |
